# Supplementary material for: Macrophage network dynamics depend on haptokinesis for optimal local surveillance
Source: eLife. 2022 Mar 28;11:e75354. doi: 10.7554/eLife.75354 (PMC8963880; doi:10.7554/eLife.75354)
Supplement: Figure 1—figure supplement 1—source data 2. [file elife-75354-fig1-figsupp1-data2.csv]

Time (h)	Ctrl 1	Ctrl 2	Ctrl 3	Ctrl 4	Ctrl 5	CK666 1	CK666 2	CK666 3	CK666 4	CK666 5		Ctrl	CK666
0	0.381	0.419	0.552	0.563	0.453	0.967	0.976	0.665	0.955	0.952	1	0.4736	0.903
0.25	0.431	0.331	0.575	0.571	0.466	0.959	0.977	0.641	0.989	0.957	2	0.4748	0.9046
0.5	0.456	0.338	0.483	0.516	0.341	0.977	1	0.849	0.698	0.57	3	0.4268	0.8188
0.75	0.435	0.345	0.68	0.402	0.386	0.998	0.994	1	0.543	0.631	4	0.4496	0.8332
1	0.371	0.453	0.566	0.354	0.433	0.971	0.947	0.738	0.656	0.572	5	0.4354	0.7768
1.25	0.431	0.384	0.738	0.412	0.421	0.972	0.976	0.562	0.699	0.697	6	0.4772	0.7812
1.5	0.407	0.264	0.434	0.395	0.484	0.982	0.967	0.67	0.808	0.774	7	0.3968	0.8402
1.75	0.566	0.253	0.367	0.354	0.451	0.973	0.958	0.519	0.827	0.527	8	0.3982	0.7608
2	0.366	0.287	0.303	0.384	0.281	0.982	0.964	0.52	0.777	0.628	9	0.3242	0.7742
2.25	0.445	0.324	0.279	0.465	0.392	0.982	0.998	0.728	0.739	0.581	10	0.381	0.8056
2.5	0.386	0.234	0.265	0.348	0.308	0.909	0.907	0.577	0.746	0.55	11	0.3082	0.7378
2.75	0.447	0.25	0.356	0.338	0.34	0.853	0.81	0.733	0.766	0.37	12	0.3462	0.7064
3	0.323	0.302	0.301	0.347	0.416	0.647	0.93	0.784	0.806	0.367	13	0.3378	0.7068
3.25	0.577	0.296	0.318	0.292	0.271	0.6	0.986	0.801	0.753	0.466	14	0.3508	0.7212
3.5	0.458	0.288	0.367	0.254	0.26	0.474	0.954	0.705	0.687	0.569	15	0.3254	0.6778
3.75	0.315	0.217	0.331	0.381	0.23	0.685	0.792	0.686	0.543	0.497	16	0.2948	0.6406
4	0.233	0.243	0.321	0.271	0.216	0.563	0.815	0.576	0.659	0.694	17	0.2568	0.6614
4.25	0.286	0.28	0.318	0.258	0.307	0.561	0.62	0.762	0.767	0.821	18	0.2898	0.7062
4.5	0.429	0.221	0.325	0.341	0.305	0.522	0.522	0.717	0.687	0.625	19	0.3242	0.6146
4.75	0.45	0.215	0.371	0.283	0.326	0.581	0.628	0.647	0.599	0.56	20	0.329	0.603
5	0.665	0.254	0.386	0.369	0.25	0.573	0.537	0.418	0.776	0.643	21	0.3848	0.5894
5.25	0.242	0.237	0.386	0.347	0.226	0.631	0.607	0.559	0.993	0.688	22	0.2876	0.6956
5.5	0.281	0.25	0.271	0.342	0.224	0.704	0.894	0.337	0.876	0.615	23	0.2736	0.6852
5.75	0.317	0.229	0.284	0.35	0.317	0.646	0.698	0.39	0.911	0.824	24	0.2994	0.6938
6	0.422	0.232	0.311	0.311	0.223	0.8	0.634	0.376	0.991	0.755	25	0.2998	0.7112
6.25	0.384	0.227	0.427	0.307	0.202	0.725	0.601	0.312	0.957	0.454	26	0.3094	0.6098
6.5	0.362	0.224	0.384	0.29	0.249	0.463	0.665	0.236	0.682	0.532	27	0.3018	0.5156
6.75	0.248	0.288	0.304	0.338	0.238	0.761	0.683	0.426	0.835	0.401	28	0.2832	0.6212
7	0.252	0.254	0.367	0.277	0.315	0.901	0.811	0.384	0.795	0.346	29	0.293	0.6474
7.25	0.244	0.261	0.317	0.41	0.363	0.99	0.994	0.492	0.763	0.496	30	0.319	0.747
7.5	0.185	0.171	0.262	0.346	0.272	0.867	0.725	0.481	0.623	0.531	31	0.2472	0.6454
7.75	0.181	0.222	0.361	0.278	0.247	1	0.768	0.534	0.621	0.497	32	0.2578	0.684
8	0.195	0.2	0.285	0.356	0.248	0.988	0.86	0.421	0.732	0.569	33	0.2568	0.714
8.25	0.209	0.268	0.303	0.329	0.253	0.983	0.732	0.404	0.654	0.607	34	0.2724	0.676
8.5	0.225	0.328	0.31	0.326	0.262	0.94	0.705	0.28	0.9	0.491	35	0.2902	0.6632
8.75	0.232	0.248	0.294	0.353	0.246	0.988	0.579	0.26	0.584	0.547	36	0.2746	0.5916
9	0.225	0.221	0.296	0.292	0.298	0.758	0.952	0.299	0.845	0.646	37	0.2664	0.7
9.25	0.145	0.291	0.28	0.421	0.303	0.968	0.969	0.336	0.623	0.654	38	0.288	0.71
9.5	0.228	0.249	0.288	0.485	0.32	0.99	0.617	0.213	0.662	0.53	39	0.314	0.6024
9.75	0.23	0.257	0.354	0.51	0.388	0.971	0.723	0.229	0.675	0.453	40	0.3478	0.6102
10	0.235	0.25	0.308	0.336	0.271	0.972	0.652	0.231	0.575	0.367	41	0.28	0.5594
10.25	0.239	0.299	0.25	0.364	0.265	0.838	0.661	0.221	0.573	0.439	42	0.2834	0.5464
10.5	0.18	0.246	0.248	0.343	0.316	0.984	0.654	0.274	0.608	0.523	43	0.2666	0.6086
10.75	0.217	0.303	0.231	0.35	0.281	1	0.742	0.227	0.621	0.642	44	0.2764	0.6464
11	0.229	0.23	0.216	0.301	0.309	0.888	0.872	0.185	0.61	0.76	45	0.257	0.663
11.25	0.199	0.222	0.232	0.284	0.444	0.915	0.668	0.189	0.653	0.678	46	0.2762	0.6206
11.5	0.213	0.209	0.203	0.255	0.27	0.746	0.715	0.263	0.77	0.857	47	0.23	0.6702
11.75	0.22	0.223	0.244	0.267	0.293	0.744	0.751	0.318	0.766	0.667	48	0.2494	0.6492
12	0.263	0.202	0.32	0.45	0.366	0.993	0.752	0.414	0.657	0.731	49	0.3202	0.7094
12.25	0.165	0.218	0.238	0.265	0.352	0.98	0.619	0.429	0.503	0.663	50	0.2476	0.6388
12.5	0.189	0.158	0.241	0.276	0.287	0.99	0.861	0.357	0.494	0.648	51	0.2302	0.67
12.75	0.181	0.229	0.315	0.438	0.262	0.972	0.982	0.277	0.392	0.79	52	0.285	0.6826
13	0.293	0.261	0.246	0.35	0.301	0.977	0.922	0.359	0.332	0.632	53	0.2902	0.6444
13.25	0.346	0.307	0.323	0.292	0.281	0.944	0.754	0.282	0.296	0.652	54	0.3098	0.5856
13.5	0.189	0.231	0.339	0.267	0.266	1	0.638	0.453	0.507	0.728	55	0.2584	0.6652
13.75	0.223	0.196	0.278	0.295	0.209	0.967	0.711	0.357	0.568	0.513	56	0.2402	0.6232
14	0.274	0.229	0.208	0.222	0.212	0.985	0.693	0.372	0.523	0.503	57	0.229	0.6152
14.25	0.284	0.337	0.198	0.291	0.276	1	0.606	0.364	0.579	0.613	58	0.2772	0.6324
14.5	0.183	0.219	0.219	0.32	0.218	0.958	0.717	0.401	0.643	0.519	59	0.2318	0.6476
14.75	0.254	0.253	0.275	0.354	0.189	0.872	0.768	0.578	0.603	0.443	60	0.265	0.6528
15	0.212	0.213	0.267	0.377	0.233	0.92	0.678	0.463	0.63	0.598	61	0.2604	0.6578
15.25	0.189	0.304	0.219	0.249	0.194	0.948	0.733	0.328	0.497	0.604	62	0.231	0.622
15.5	0.13	0.221	0.336	0.216	0.217	0.905	0.573	0.388	0.552	0.716	63	0.224	0.6268
15.75	0.248	0.353	0.239	0.26	0.23	0.973	0.77	0.416	0.6	0.644	64	0.266	0.6806
16	0.27	0.179	0.211	0.312	0.235	0.968	0.78	0.302	0.586	0.639	65	0.2414	0.655
16.25	0.235	0.228	0.226	0.326	0.277	0.97	0.763	0.302	0.517	0.641	66	0.2584	0.6386
16.5	0.275	0.166	0.203	0.244	0.478	0.991	0.732	0.436	0.603	0.586	67	0.2732	0.6696
16.75	0.622	0.19	0.302	0.303	0.326	1	0.734	0.364	0.616	0.756	68	0.3486	0.694
17	0.309	0.183	0.242	0.383	0.218	0.74	0.689	0.321	0.697	0.608	69	0.267	0.611
17.25	0.305	0.172	0.276	0.326	0.365	0.848	0.548	0.315	0.71	0.537	70	0.2888	0.5916
17.5	0.191	0.221	0.226	0.391	0.325	0.844	0.925	0.311	0.638	0.43	71	0.2708	0.6296
17.75	0.315	0.208	0.212	0.38	0.27	0.807	0.976	0.223	0.659	0.493	72	0.277	0.6316
18	0.25	0.172	0.316	0.262	0.376	1	0.753	0.259	0.642	0.468	73	0.2752	0.6244
18.25	0.232	0.247	0.268	0.226	0.308	0.984	0.623	0.269	0.628	0.492	74	0.2562	0.5992
18.5	0.177	0.215	0.218	0.352	0.221	0.795	0.631	0.341	0.491	0.434	75	0.2366	0.5384
18.75	0.218	0.267	0.238	0.291	0.311	0.728	0.593	0.417	0.477	0.489	76	0.265	0.5408
19	0.341	0.208	0.192	0.47	0.355	0.688	0.655	0.452	0.569	0.703	77	0.3132	0.6134
19.25	0.15	0.156	0.166	0.313	0.313	0.734	0.653	0.389	0.563	0.509	78	0.2196	0.5696
19.5	0.208	0.207	0.192	0.241	0.361	0.833	0.668	0.462	0.666	0.469	79	0.2418	0.6196
19.75	0.4	0.225	0.253	0.193	0.317	0.906	0.668	0.311	0.472	0.619	80	0.2776	0.5952
20	0.221	0.157	0.212	0.181	0.246	0.795	0.786	0.177	0.541	0.526	81	0.2034	0.565
20.25	0.367	0.136	0.201	0.248	0.321	0.91	0.664	0.158	0.473	0.614	82	0.2546	0.5638
20.5	0.229	0.189	0.225	0.23	0.313	0.922	0.771	0.278	0.658	0.379	83	0.2372	0.6016
20.75	0.19	0.188	0.338	0.252	0.293	0.995	0.986	0.341	0.541	0.52	84	0.2522	0.6766
21	0.475	0.217	0.248	0.178	0.359	0.997	0.637	0.393	0.503	0.497	85	0.2954	0.6054
21.25	0.33	0.185	0.364	0.168	0.297	0.94	0.596	0.308	0.371	0.419	86	0.2688	0.5268
21.5	0.526	0.294	0.375	0.28	0.229	0.903	0.507	0.328	0.432	0.632	87	0.3408	0.5604
21.75	0.389	0.209	0.331	0.412	0.311	0.803	0.656	0.346	0.458	0.39	88	0.3304	0.5306
22	0.169	0.204	0.22	0.406	0.343	0.721	0.509	0.37	0.516	0.569	89	0.2684	0.537
22.25	0.181	0.186	0.27	0.414	0.259	0.735	0.446	0.344	0.561	0.411	90	0.262	0.4994
22.5	0.253	0.189	0.425	0.446	0.348	0.688	0.8	0.453	0.588	0.549	91	0.3322	0.6156
22.75	0.459	0.205	0.22	0.276	0.271	0.824	0.59	0.249	0.435	0.551	92	0.2862	0.5298
23	0.257	0.231	0.25	0.361	0.303	0.81	0.729	0.252	0.682	0.729	93	0.2804	0.6404
23.25	0.222	0.171	0.206	0.264	0.195	0.921	0.971	0.203	0.563	0.548	94	0.2116	0.6412
23.5	0.298	0.175	0.375	0.293	0.298	0.686	0.936	0.211	0.629	0.573	95	0.2878	0.607
23.75	0.271	0.202	0.33	0.448	0.218	0.775	0.791	0.296	0.606	0.558	96	0.2938	0.6052
24	0.186	0.197	0.217	0.481	0.141	0.769	0.891	0.365	0.672	0.481	97	0.2444	0.6356
