# Supplementary material for: Macrophage network dynamics depend on haptokinesis for optimal local surveillance
Source: eLife. 2022 Mar 28;11:e75354. doi: 10.7554/eLife.75354 (PMC8963880; doi:10.7554/eLife.75354)
Supplement: Figure 3—figure supplement 2—source data 2. [file elife-75354-fig3-figsupp2-data2.csv]

Tln1-/-	Tln1-/- +Y27632
0.191596798	0.047478599
0.327305412	0.103543201
0.407767212	0.307213208
0.577037428	0.300927591
0.267246589	0.263781007
0.622074008	0.185074797
0.616403986	0.145791597
0.210583806	0.124445404
0.90641398	0.067885802
0.259836596	0.175518603
0.226937402	0.104898002
0.515148025	0.135905994
0.644627977	0.172076994
0.407587197	0.0553926
0.324777598	0.070752602
0.267784204	0.173841594
0.328035001	0.250951191
0.313871987	0.205306197
0.380636388	0.112238398
0.64429801	0.182152796
0.893183984	0.310172411
0.702353977	0.283771791
0.842808019	0.04909566
0.967590027	0.126412804
0.673818011	0.137231997
